# Supplementary material for: Ag/Ag3PO4 Nanoparticle-Decorated Hydroxyapatite Functionalized Calcium Carbonate: Ultrasound-Assisted Sustainable Synthesis, Characterization, and Antimicrobial Activity
Source: MDPI journal article supplement (doi:10.3390/ma16041338), 2023-02-04
Supplement: s1 [file s1]

# Supplementary materials

## **Ag/Ag<sub>3</sub>PO<sub>4</sub> Nanoparticle-Decorated Hydroxyapatite Functionalized Calcium Carbonate: Ultrasound-Assisted Sustainable Synthesis, Characterization, and Antimicrobial Activity**

**Alessandro Di Michele <sup>1</sup>, Morena Nocchetti <sup>2,\*</sup>, Donatella Pietrella <sup>3</sup>, Loredana Latterini <sup>4</sup>,  
Giulia Quaglia <sup>4</sup>, Ilaria Mattu <sup>2</sup>, Giuseppina Padeletti <sup>5</sup>, Saulius Kaciulis <sup>5</sup>, Eleonora Bolli <sup>5</sup> and  
Valeria Ambrogi <sup>2,\*</sup>**

<sup>1</sup> Dipartimento di Fisica e Geologia, University of Perugia, Via Alessandro Pascoli, 06123 Perugia, Italy

<sup>2</sup> Dipartimento di Scienze Farmaceutiche, University of Perugia, Via del Liceo 1, 06123 Perugia, Italy

<sup>3</sup> Dipartimento di Medicina e Chirurgia, University of Perugia, Via Gambuli, 1, 06132 Perugia, Italy

<sup>4</sup> Nano4Light Lab, Dipartimento di Chimica, Biologia e Biotecnologie, University of Perugia, Via Elce di Sotto 8, 06123 Perugia, Italy

<sup>5</sup> Institute for the Study of Nanostructured Materials, ISMN-CNR, Via Salaria Km 29,300, 00015 Monterotondo, Italy

\* Correspondence: [morena.nocchetti@unipg.it](mailto:morena.nocchetti@unipg.it) (M.N.); [valeria.ambrogi@unipg.it](mailto:valeria.ambrogi@unipg.it) (V.A.)

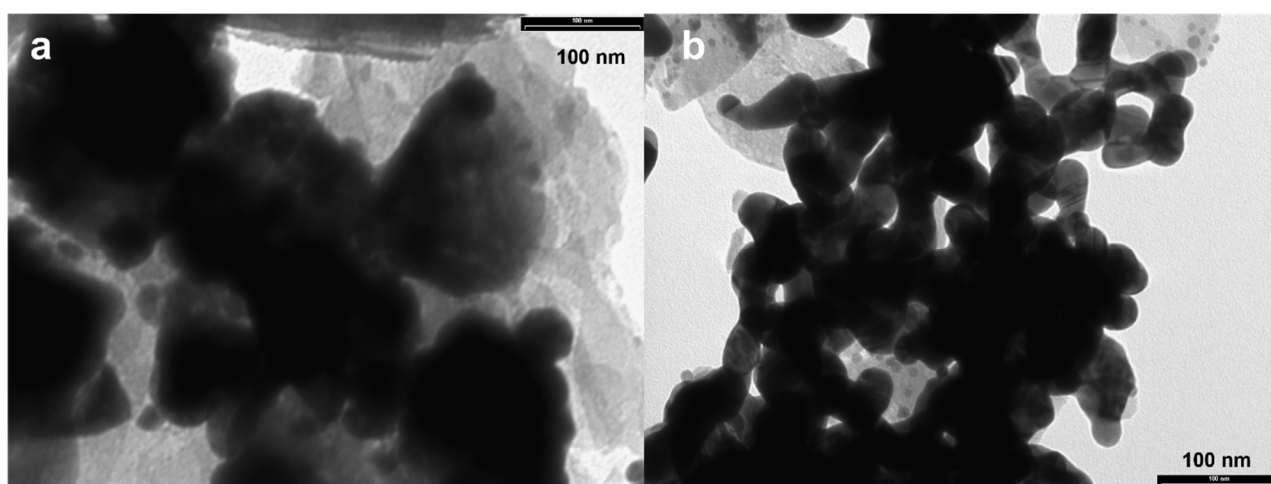

**Figure S1:** TEM images of 50C (a) and 50B (b).
